# Supplementary material for: Structural basis of ribosomal 30S subunit degradation by RNase R
Source: PubMed Central journal article supplement (PMC10901742; doi:10.1038/s41586-024-07027-6), 2024-02-07
Supplement: 41586_2024_7027_MOESM1_ESM.pdf [file 41586_2024_7027_MOESM1_ESM.pdf]

**Supplementary information**

---

**Structural basis of ribosomal 30S subunit degradation by RNase R**

---

In the format provided by the authors and unedited

## Supplementary Information for

### **Structural basis of ribosomal 30S subunit degradation by RNase R**

Lyudmila Dimitrova-Paternoga<sup>1</sup>, Sergo Kasvandik<sup>2</sup>, Bertrand Beckert<sup>3</sup>, Sander Granneman<sup>4</sup>, Tanel Tenson<sup>2</sup>, Daniel N. Wilson<sup>1,\*</sup>, Helge Paternoga<sup>1,\*</sup>

<sup>1</sup> Institute for Biochemistry and Molecular Biology, University of Hamburg, Martin-Luther-King-Pl. 6, 20146 Hamburg, Germany

<sup>2</sup> University of Tartu, Institute of Technology, 50411 Tartu, Estonia

<sup>3</sup> Dubochet Center for Imaging (DCI) at EPFL, EPFL SB IPHYS DCI, Lausanne, Switzerland

<sup>4</sup> Centre for Engineering Biology (SynthSys), University of Edinburgh, Edinburgh, Scotland

\*Correspondence to:

Helge Paternoga (Helge.Paternoga@uni-hamburg.de)

Daniel Wilson (Daniel.Wilson@uni-hamburg.de)

## **Table of Contents**

Supplementary Fig. 1. Source data

Supplementary Fig. 2. Purification of the RNase R-30S complex

Supplementary Fig. 3. Establishment of an RNase R *in vitro* degradation assay

Supplementary Table 1. Northern blot probe sequences

Supplementary Table 2. Primers used to create endogenously-tagged RNase R-FLAG

**a Figure 2**

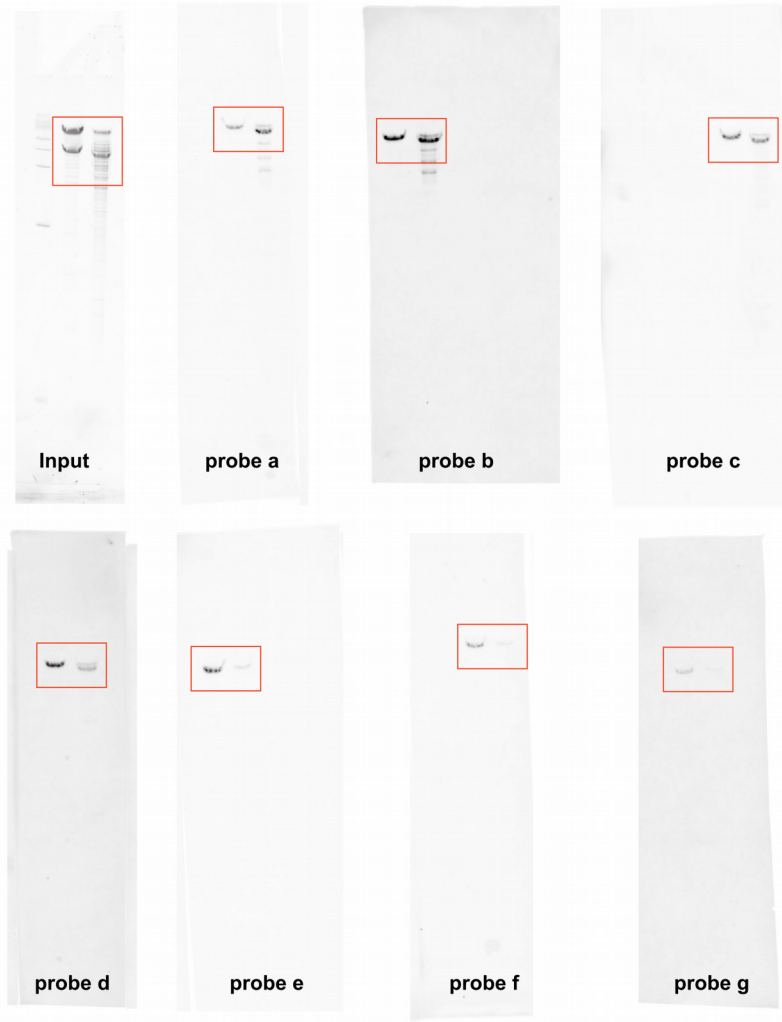

**b Figure 3**

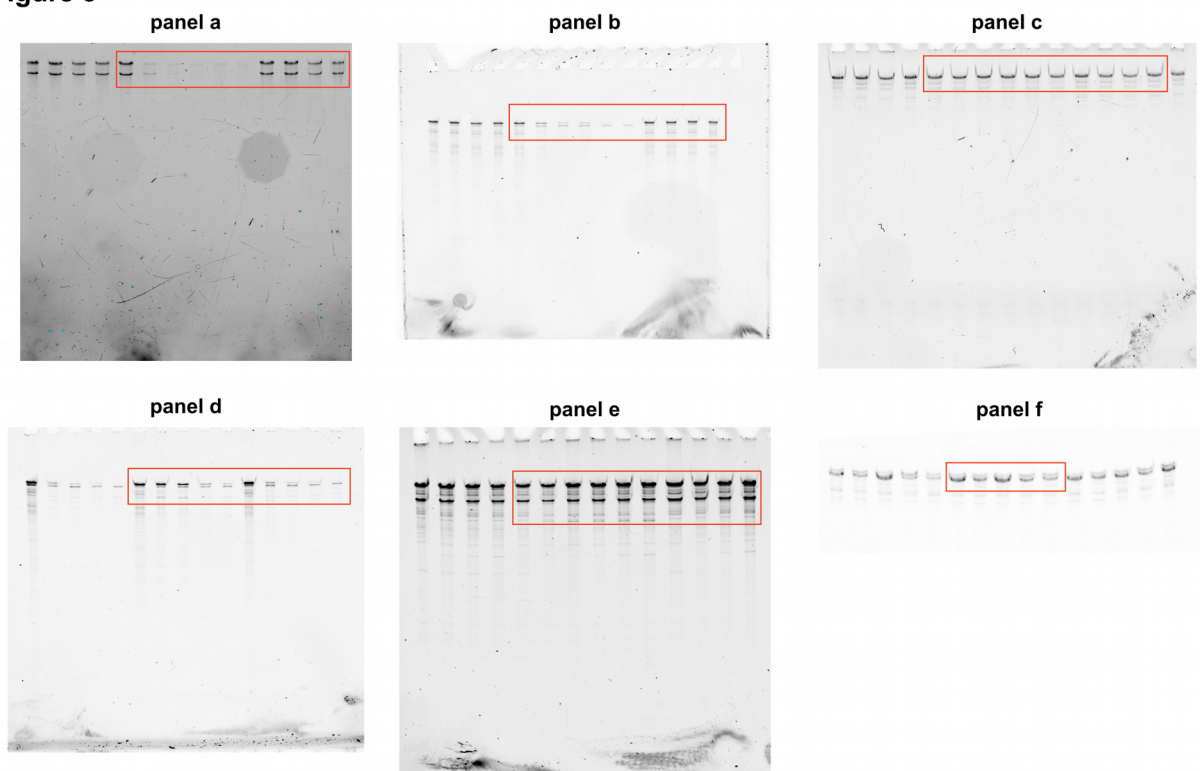

**c Extended Figure 7**

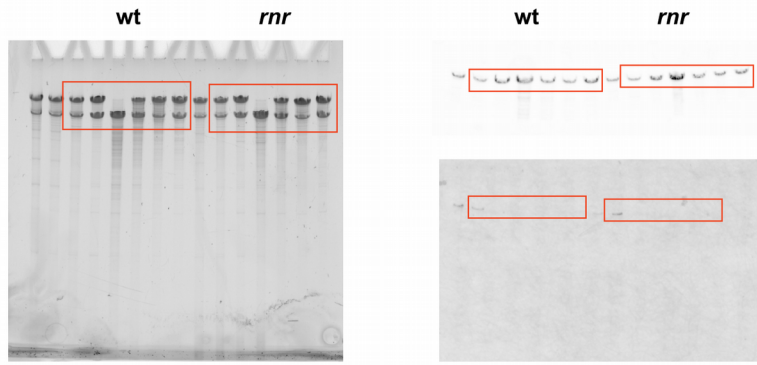

**d Figure S2**

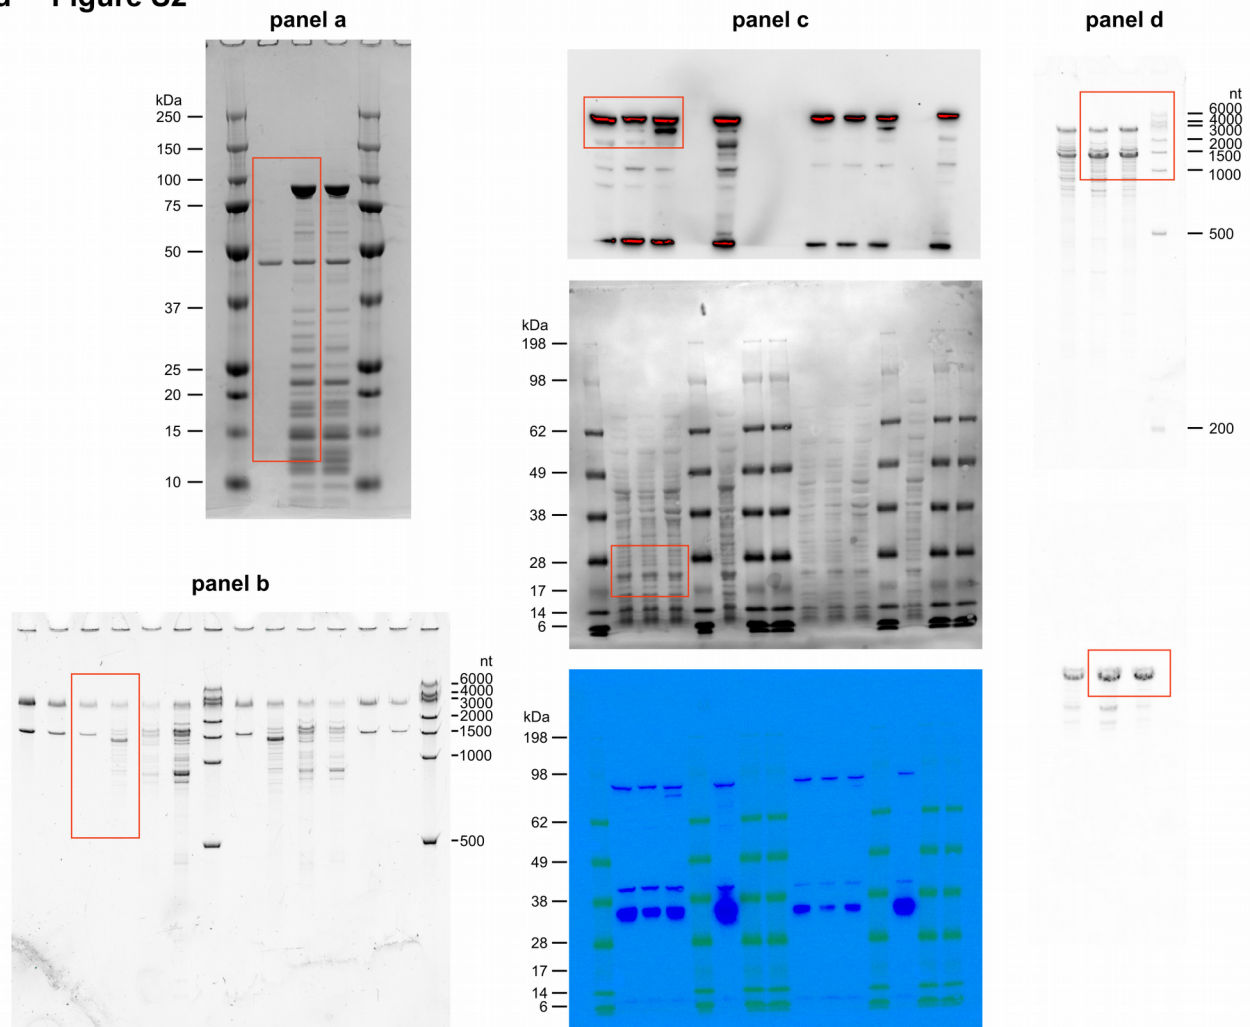

**e Figure S3**

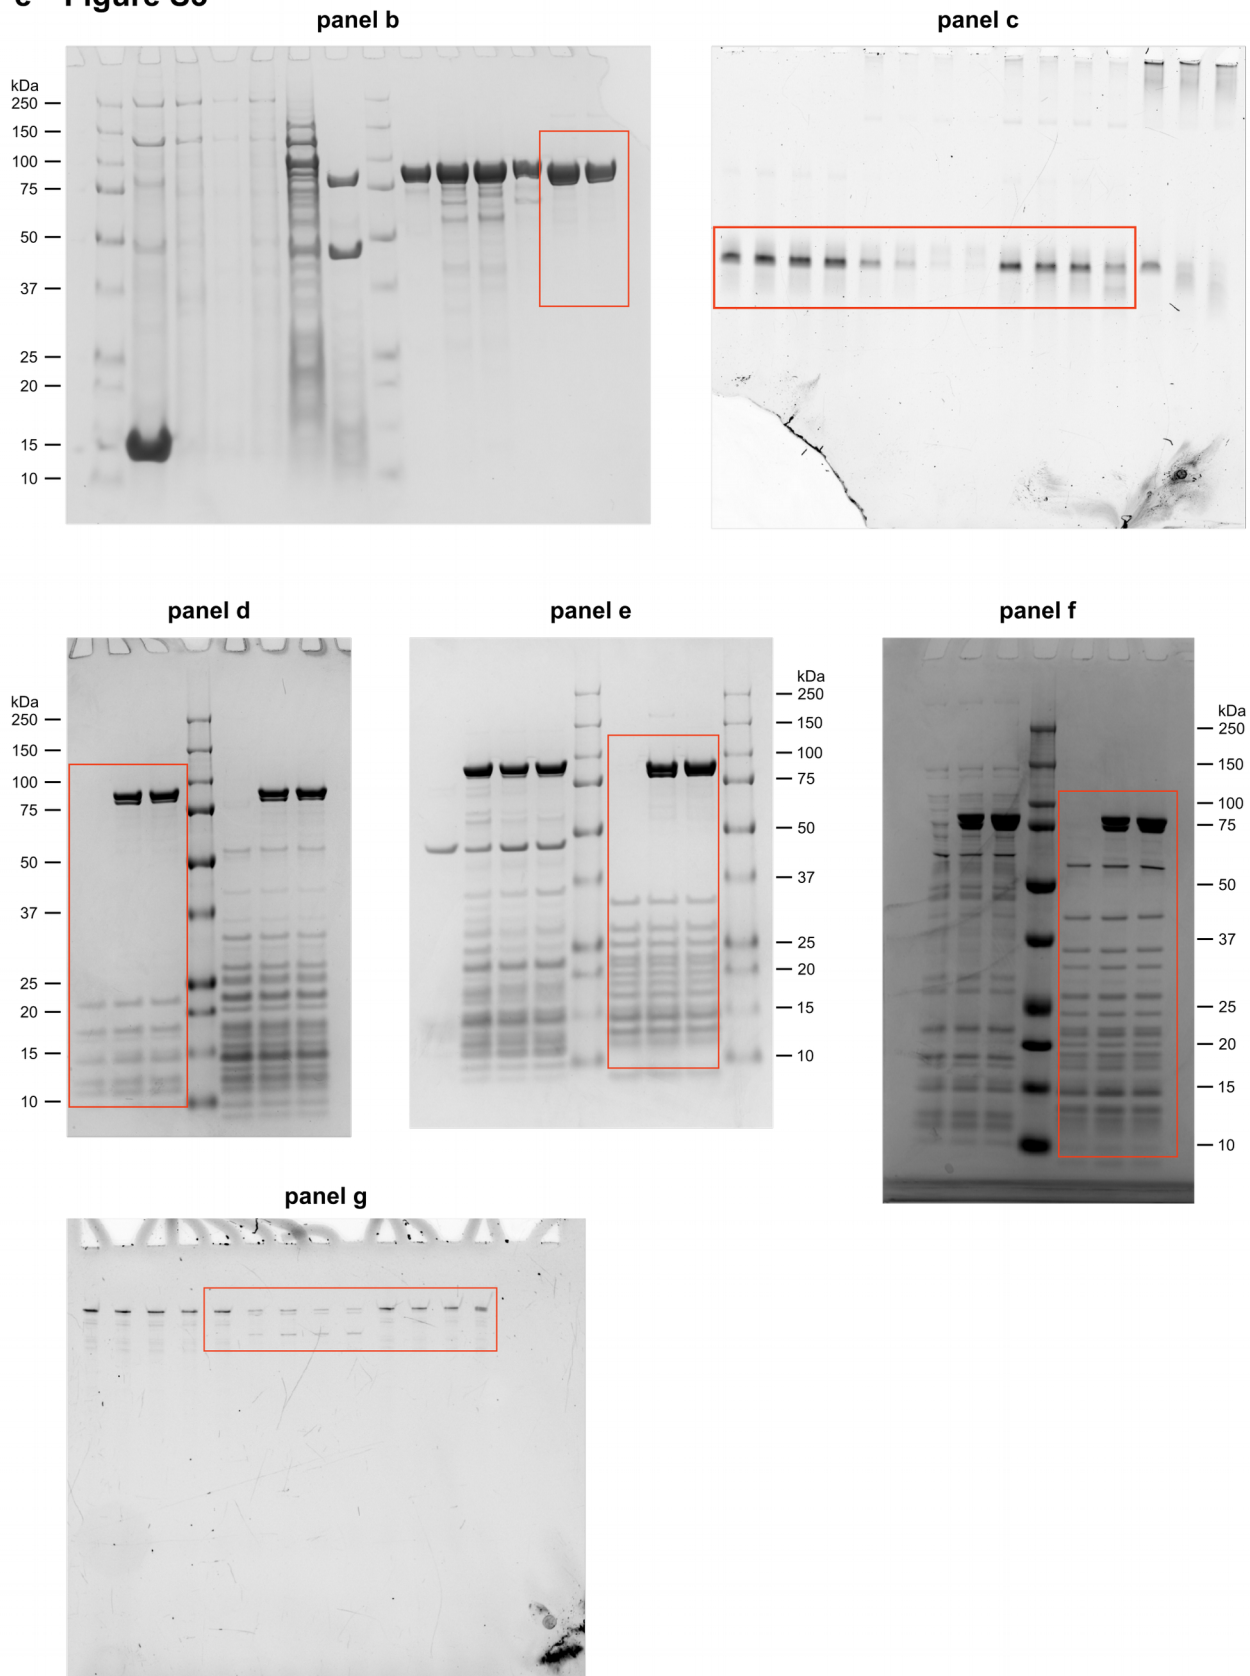

**Supplementary Fig. 1. Source data.** (a), Uncropped Northern blots used for Fig. 2. (b), Uncropped gels used for Fig. 3. (c), Uncropped gel and Northern blots used for Extended Figure 7. (d), Uncropped gels, Northern and Western blots used for Supplementary Fig. 2. For the Western blot shown in panel c (top), saturated pixels are shown in red (the signal of interest is not saturated) (e), Uncropped gels used for Supplementary Fig. 3.

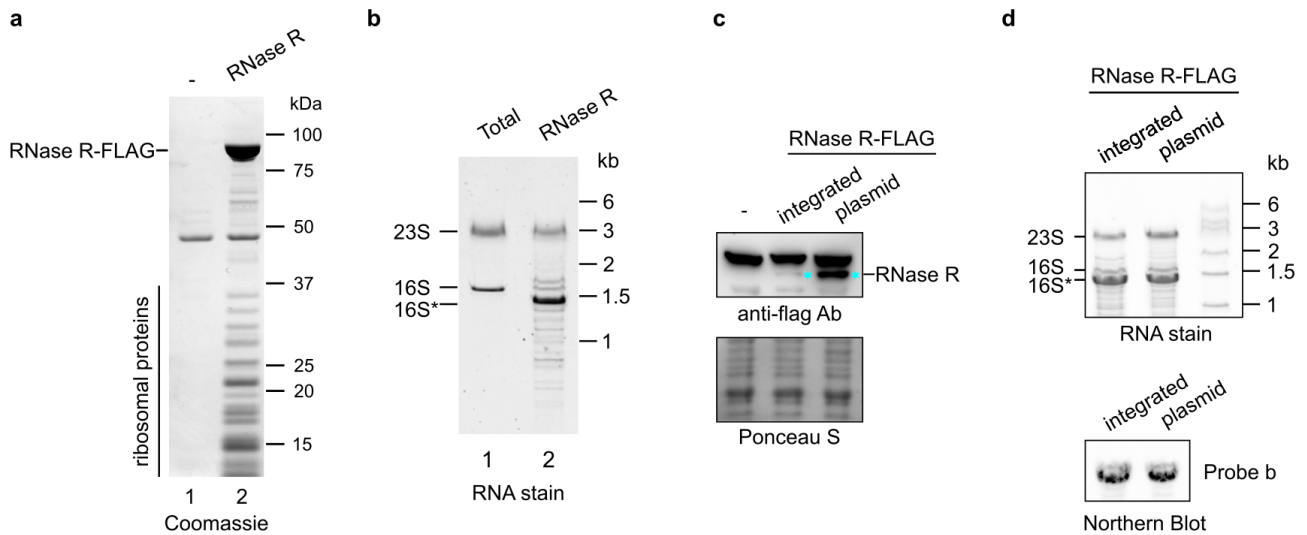

**Supplementary Fig. 2. Purification of the RNase R-30S complex.** (a) SDS-PAGE analysis of immuno-precipitated C-terminally FLAG-tagged RNase R (plasmid-based expression) (lane 2) as compared to a pull-down from vector-only control strain (lane 1) (n=5). (b) RNA analysis of immuno-precipitated C-terminally FLAG-tagged RNase R (plasmid-based expression) (n=5). Total RNA was loaded as a control. (c) Western blot analysis of wildtype strain (-), endogenously tagged RNase R-FLAG and a plasmid-borne RNase R-FLAG (expressed in  $\Delta rnr$  cells). The FLAG-tagged species were detected by HRP-coupled anti-FLAG Antibody (upper panel). The inputs were stained by Ponceau S as loading control (lower panel). The bands corresponding to RNase R-FLAG are indicated with an asterisk (two technical replicates were performed). (d) TBE-Urea polyacrylamide gel electrophoresis (PAGE) analysis of RNA extracted after immunoprecipitation of C-terminally FLAG-tagged RNase R, both from endogenous and plasmid-based expression. Equal amounts of RNA were loaded. Lower panel: Northern Blot analysis of the same RNA samples with probe b highlights the same truncation pattern of 16S rRNA (two technical replicates were performed). For gel source data, see Supplementary Fig. 1.

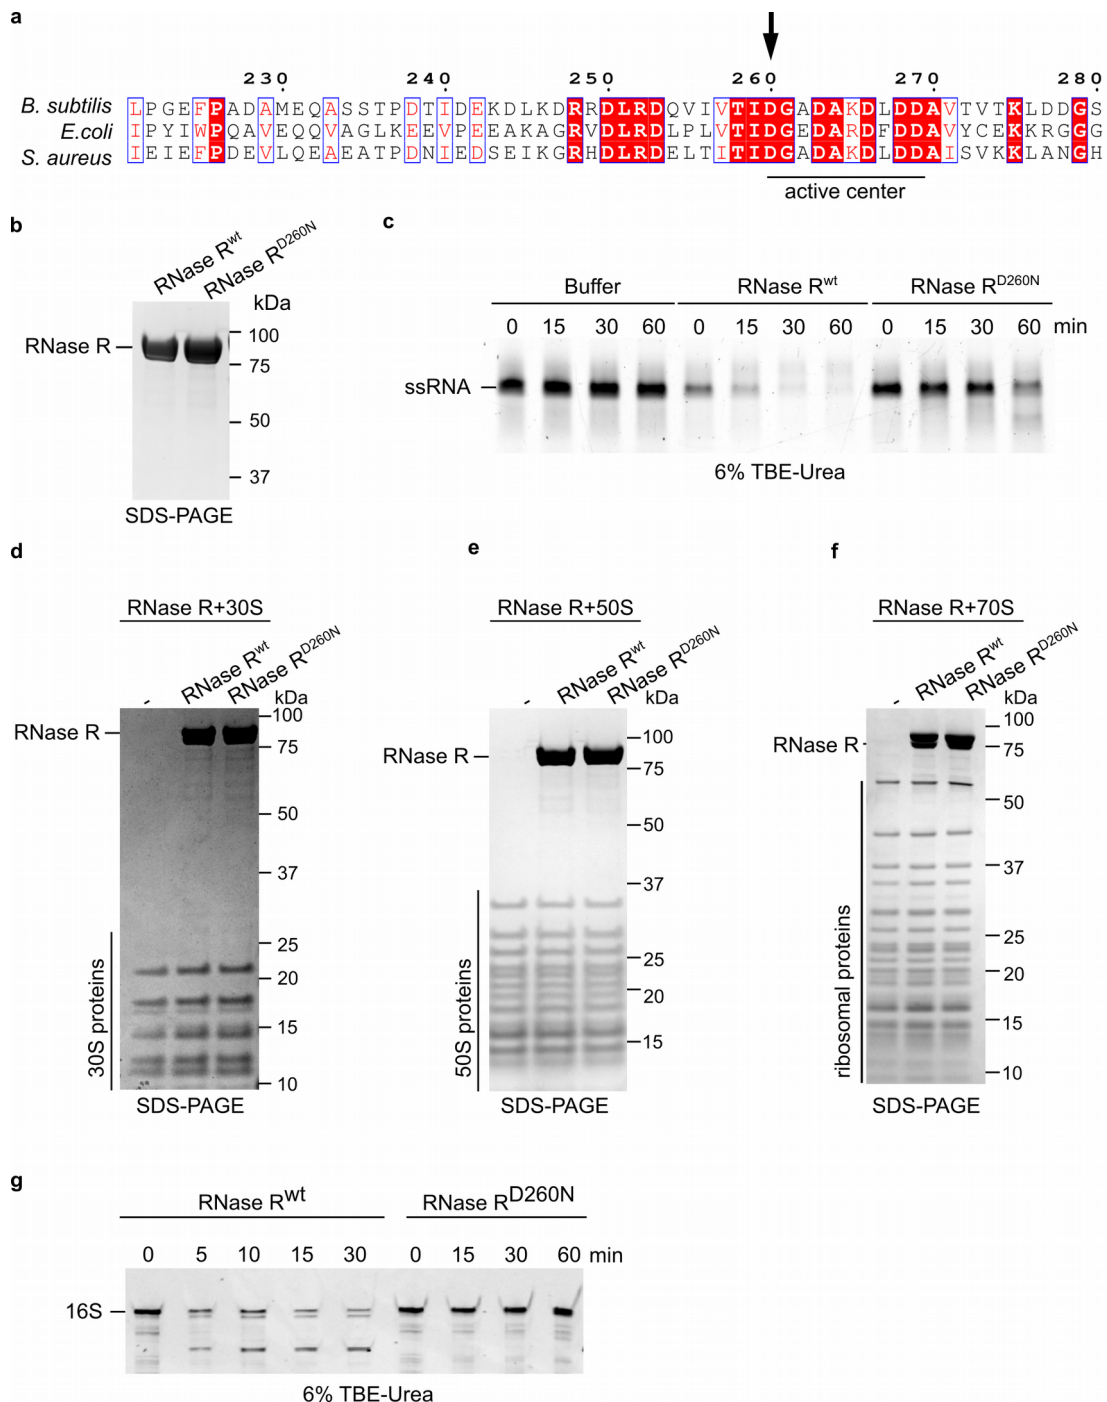

**Supplementary Fig. 3. Establishment of an RNase R *in vitro* degradation assay.** (a) Multiple sequence alignment of RNase R from *B. subtilis*, *E. coli* and *S. aureus*. The conserved active center of the enzyme is underlined. In *B. subtilis*, D260, D267 and D268 are predicted by homology to coordinate a  $Mg^{2+}$  ion with two waters (Chu *et al.* "Structural Insights into RNA Unwinding and Degradation by RNase R." *Nucleic Acids Research* 45, no. 20 (November 16, 2017): 12015–24. <https://doi.org/10.1093/nar/gkx880>). (b) SDS-PAGE analysis of recombinantly expressed and purified wildtype RNase R ( $Rnr^{wt}$ ) and catalytically inactive RNase R-D260N mutant ( $Rnr^{D260N}$ ) ( $n=3$ ). (c) *In vitro* degradation assay using linear RNA as a substrate. RNase R was mixed with the substrate and incubated at 37°C for 0-60 mins, after which the RNA was analyzed on 6% denaturing TBE-Urea gels ( $n=2$ ). (d-f) Inputs for the assays in Figure 3 c, d, f, respectively ( $n=2$ ). (g) *In vitro* degradation assay of isolated 30S ribosomal subunits, catalyzed by recombinantly purified RNase R wt and catalytic mutant in a buffer containing 15 mM  $MgCl_2$ . RNase R was mixed with the substrate and incubated at 37°C for the above indicated times after which the RNA was extracted and analyzed on 6% denaturing TBE-Urea gel (two technical replicates were performed). For gel source data, see Supplementary Fig. 1.



**Supplementary Table 1 Northern blot probe sequences**

| <b>Probe</b>               | <b>Boundaries</b>         | <b>Sequence</b>                                              |
|----------------------------|---------------------------|--------------------------------------------------------------|
| a                          | 22 - 41                   | CCAGCGTTCGTCCTGAGCCA                                         |
| b                          | 652 - 670                 | CTGCACTCAAGTTCCCCAG                                          |
| c                          | 1372 - 1391               | GAACGTATTACCCGCGGCAT                                         |
| d                          | 1392 - 1409               | GGTGTGTACAAGGCCCGG                                           |
| e                          | 1412 - 1432               | CAAACCTCTCGTGGTGTGACGG                                       |
| f                          | 1422 - 1441               | CGGGTGTTACAAACTCTCGT                                         |
| g                          | 1527 - 1549               | GGAGGTGATCCAGCCGCACCTTC                                      |
| 3' pre<br>(1:1<br>mixture) | +1 - +30<br><br>+43 - +57 | CCAAGGTCTTATATTCCGTAAAATATCCTT<br><br>CTAAACAAGACAGGGAACGTTC |

**Supplementary Table 2 Primers used to create endogenously-tagged RNase R-FLAG**

|                          |                                                                  |
|--------------------------|------------------------------------------------------------------|
| iPCR_GS5-<br>FLAG-CAT_fw | gattataaagatgatgatgataaaTAAGCCTCCTAAATTCACCTTTAGATAAAAAATTTAGGAG |
| iPCR_GS5-<br>FLAG-CAT_rv | gcttcctgagccgcttcctgagccGgatccCTTGTCTGCTTTCTTCATTAGAATCAATCC     |
| over1_fw                 | CAACGGAAAGAATGACATATTCAGATGTG                                    |
| over1_rv                 | gcttcctgagccggatccTTTCTTCTTTTTCCGTTTCTGTTTCG                     |
| over2_fw                 | ggatccggctcaggaagc                                               |
| over2_rv                 | TTATAAAAGCCAGTCATTAGGCCTATC                                      |
| over3_fw                 | GATAGGCCTAATGACTGGCTTTTATAAcagctcaaccagcaaataagg                 |
| over3_rv                 | GCTGGGATTGAAATGGAAGTACG                                          |
| COL_fw                   | GACAATTAACAGTCAGGGACAGG                                          |
| COL_rv                   | ATTCAGCTTCATTATTCATCCCTCC                                        |
